# Supplementary material for: The Repertoire Dissimilarity Index as a method to compare lymphocyte receptor repertoires
Source: PubMed Central journal article supplement (PMC5340033; doi:10.1186/s12859-017-1556-5), 2017-03-07

**Genes = 5**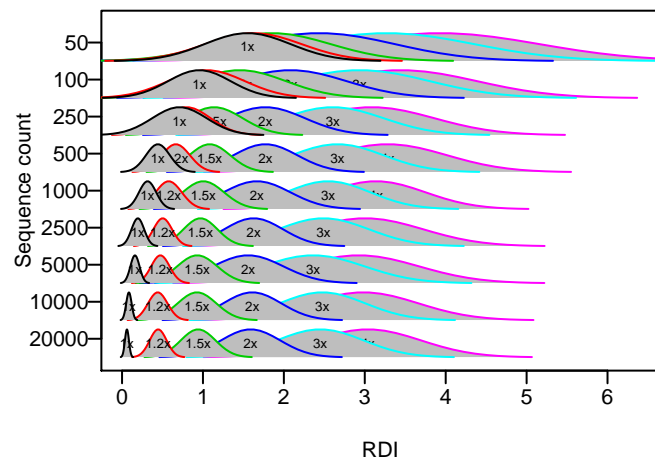**Genes = 25**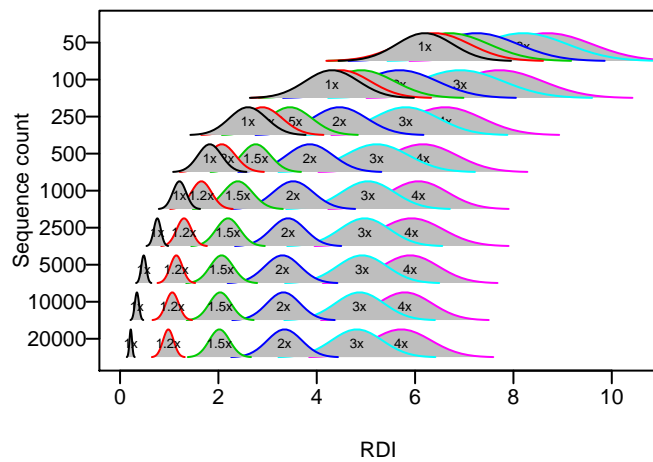**Genes = 50**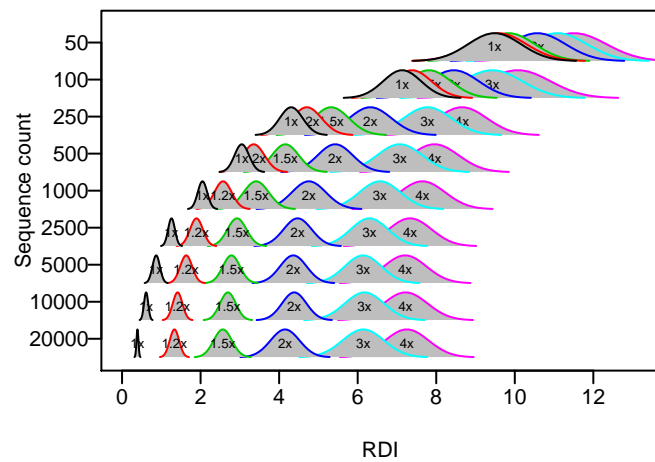**Genes = 100**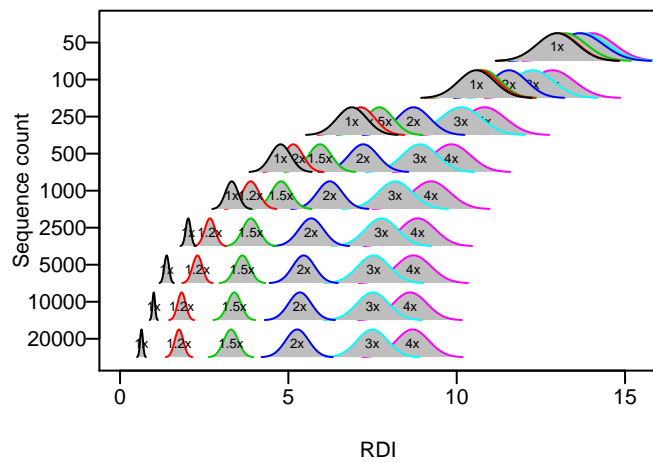**Genes = 500**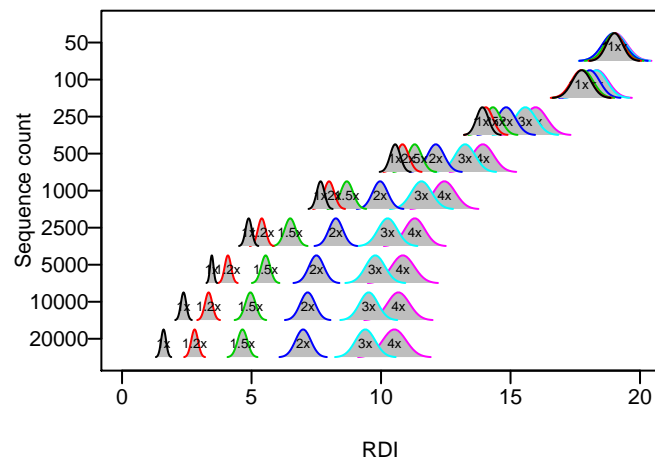**Genes = 1000**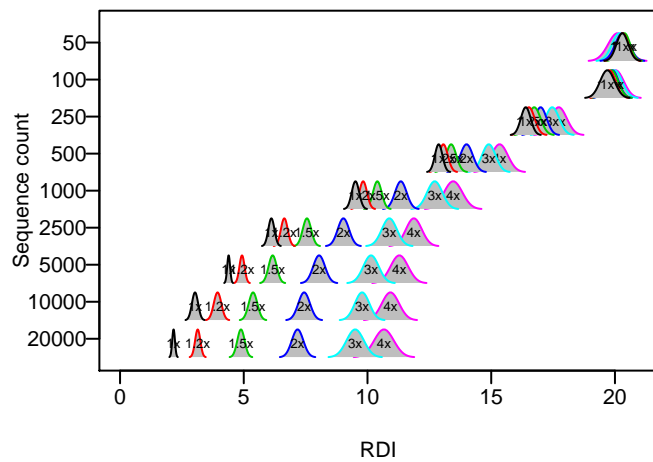

Supplement: 12859_2017_1556_MOESM1_ESM.pdf [file 12859_2017_1556_MOESM1_ESM.pdf]
